# Supplementary material
Source: PubMed Central journal article supplement (PMC3571423)
Supplement: gmb-35-980-s001.pdf [file gmb-35-980-s001.pdf]

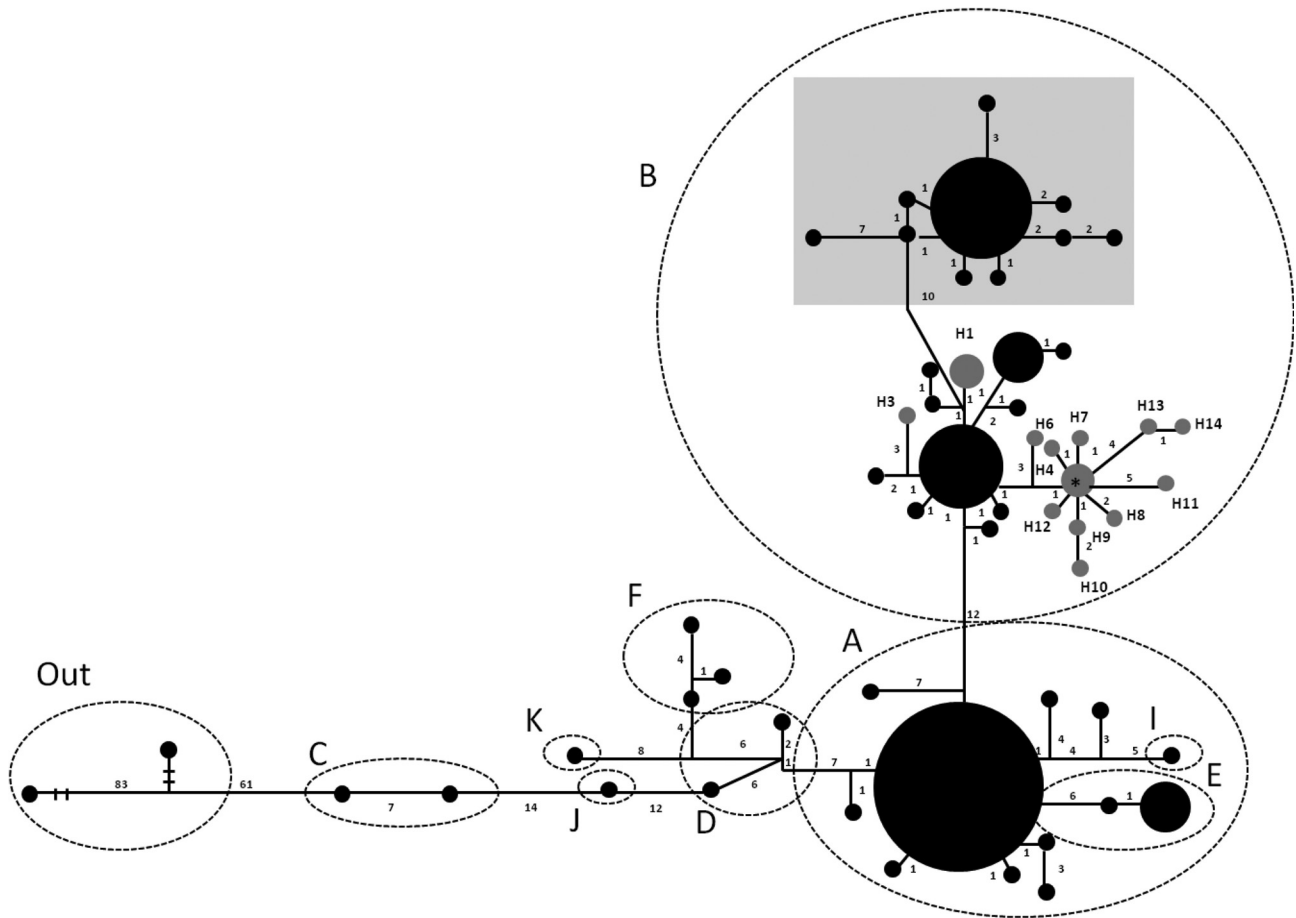

**Figure S1** - Median-joining network of *Wolbachia* 16S rDNA sequences from *Balloniscus* species. A, B, C, D, E, F, I and J represent *Wolbachia* supergroups traditionally recognized and Out identifies the sequences used as outgroup (see Figure 2); The *Oni* clade is represented inside a grey square; numbers associated with some branches represent the number of mutational steps; H1, H3, H4, H5, H6, H7, H8, H9, H10, H11, 12, H13 and H14 (\*H2) represent the different sequences found in *Balloniscus*, and are represented in grey. *Wolbachia* 16S sequences obtained from other species and used for the phylogenetic analysis (Figure 2) are represented in black. The size of the circles is proportional to the number of sequences considering all individuals.
